# Supplementary material
Source: Springer Nature journal article supplement (https://www.springermedizin.de/resource/supplementary/12958_2005_312_MOESM2_ESM.pdf/9567604)

### Natural hormone and receptor

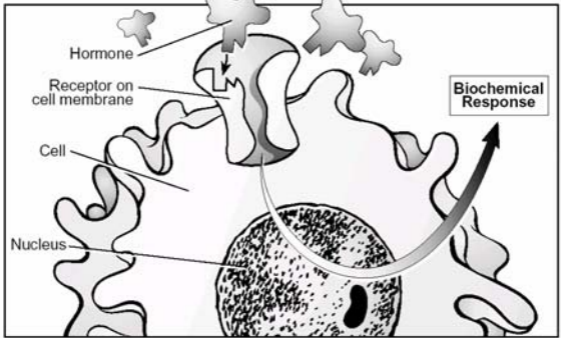

### Hormone antagonist

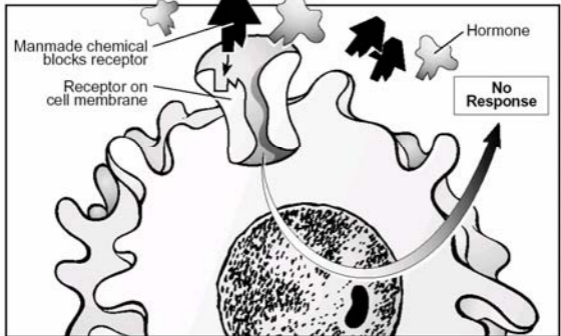

### Hormone mimic

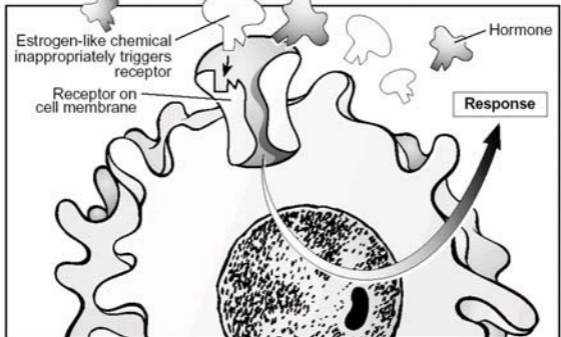

Supplement: MOESM2 [file 9567604]
